# Supplementary material for: Characteristic Volatile Fingerprints of Four Chrysanthemum Teas Determined by HS-GC-IMS
Source: MDPI journal article supplement (doi:10.3390/molecules26237113), 2021-11-24
Supplement: s1 [file s1]

# Characteristic Volatile Fingerprints of Four Chrysanthemum Teas Determined by HS-GC-IMS

Zhiling Wang, Yixin Yuan, Bo Hong, Xin Zhao - and Zhaoyu Gu -

Beijing Key Laboratory of Development and Quality Control of Ornamental Crops, Department of Ornamental Horticulture, China Agricultural University, Beijing 100193, China; bs20193170894@cau.edu.cn (Z.W.); yyxyuanyi@cau.edu.cn (Y.Y.); hongbo1203@cau.edu.cn (B.H.)  
 - Correspondence: zhaoxin5691@cau.edu.cn (X.Z.); 2019125@cau.edu.cn (Z.G.); Tel:86-010-62732641 (X.Z. & Z.G.)

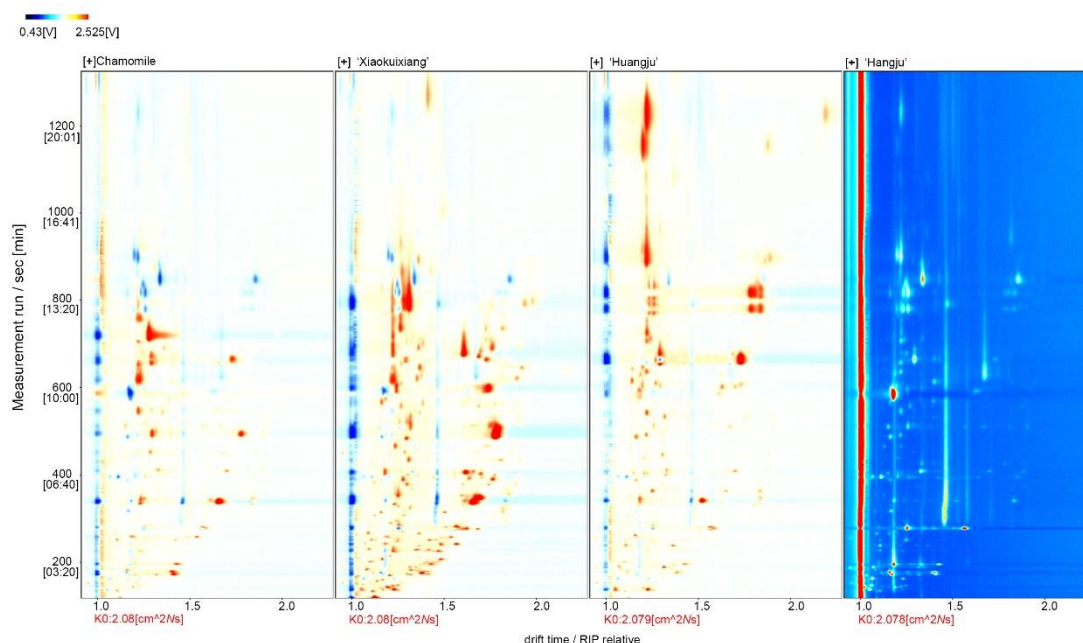

**Figure S1.** Gas-phase ion mobility spectra of VOCs from four chrysanthemum teas. The coloring conveys the substance's signal intensity: white indicates low intensity, and red indicates high intensity; hence, the darker the color, the higher the intensity.

**Table S1.** Total volatile compounds were identified from the four chrysanthemum teas.

| Compound | CAS | Formula | MW | RI    | Rt [sec] | Dt [a.u.] |
|----------|-----|---------|----|-------|----------|-----------|
| 1        | -   | -       | -  | 578.2 | 138.421  | 1.04939   |
| 2        | -   | -       | -  | 578.2 | 138.421  | 1.2297    |
| 3        | -   | -       | -  | 588.7 | 143.368  | 1.02412   |
| 4        | -   | -       | -  | 588.7 | 143.368  | 1.19178   |
| 5        | -   | -       | -  | 593.9 | 145.841  | 1.22211   |
| 6        | -   | -       | -  | 608   | 152.519  | 0.95082   |
| 7        | -   | -       | -  | 611.6 | 154.25   | 1.27014   |
| 8        | -   | -       | -  | 617.9 | 157.218  | 1.13786   |
| 9        | -   | -       | -  | 641.9 | 168.594  | 1.03254   |
| 10       | -   | -       | -  | 647.2 | 171.067  | 1.20695   |
| 11       | -   | -       | -  | 674.3 | 183.928  | 1.08225   |
| 12       | -   | -       | -  | 671.7 | 182.691  | 1.32153   |
| 13       | -   | -       | -  | 686.3 | 189.616  | 1.0713    |
| 14       | -   | -       | -  | 686.8 | 189.863  | 1.31479   |
| 15       | -   | -       | -  | 687.3 | 190.111  | 1.34681   |
| 16       | -   | -       | -  | 684.2 | 188.627  | 0.94829   |
| 17       | -   | -       | -  | 703.1 | 202.879  | 1.10113   |

|    |   |   |   |        |         |         |
|----|---|---|---|--------|---------|---------|
| 18 | - | - | - | 717.4  | 214.999 | 1.20563 |
| 19 | - | - | - | 735.3  | 230.018 | 1.09242 |
| 20 | - | - | - | 734.3  | 229.228 | 1.35694 |
| 21 | - | - | - | 734    | 228.964 | 1.4179  |
| 22 | - | - | - | 749.3  | 241.844 | 1.4842  |
| 23 | - | - | - | 751    | 243.295 | 1.18136 |
| 24 | - | - | - | 761.5  | 252.11  | 1.10776 |
| 25 | - | - | - | 759.6  | 250.47  | 1.42516 |
| 26 | - | - | - | 773.4  | 262.154 | 1.15721 |
| 27 | - | - | - | 779.5  | 267.279 | 1.08821 |
| 28 | - | - | - | 778.1  | 266.049 | 1.36766 |
| 29 | - | - | - | 789.6  | 277.528 | 1.61952 |
| 30 | - | - | - | 789.3  | 277.118 | 1.68277 |
| 31 | - | - | - | 815.1  | 307.251 | 1.12616 |
| 32 | - | - | - | 816.2  | 308.481 | 1.28371 |
| 33 | - | - | - | 822.4  | 315.666 | 1.15996 |
| 34 | - | - | - | 821.6  | 314.73  | 1.50383 |
| 35 | - | - | - | 831.2  | 325.962 | 1.31437 |
| 36 | - | - | - | 830.2  | 324.792 | 1.82694 |
| 37 | - | - | - | 833.4  | 328.536 | 1.25209 |
| 38 | - | - | - | 835.2  | 330.642 | 1.18072 |
| 39 | - | - | - | 854.9  | 353.574 | 1.25079 |
| 40 | - | - | - | 854.5  | 353.106 | 1.59077 |
| 41 | - | - | - | 863.4  | 363.402 | 1.65176 |
| 42 | - | - | - | 864.2  | 364.338 | 1.25209 |
| 43 | - | - | - | 864.4  | 364.572 | 1.83602 |
| 44 | - | - | - | 887.3  | 391.248 | 1.27804 |
| 45 | - | - | - | 887.5  | 391.482 | 1.76725 |
| 46 | - | - | - | 852.3  | 350.504 | 1.68933 |
| 47 | - | - | - | 892.2  | 397.015 | 1.06302 |
| 48 | - | - | - | 891.9  | 396.592 | 1.11246 |
| 49 | - | - | - | 889.5  | 393.841 | 1.63988 |
| 50 | - | - | - | 896.4  | 404.635 | 1.14872 |
| 51 | - | - | - | 897.2  | 406.116 | 1.18168 |
| 52 | - | - | - | 898    | 407.618 | 1.61492 |
| 53 | - | - | - | 913    | 435.292 | 1.30685 |
| 54 | - | - | - | 912.9  | 434.997 | 1.80988 |
| 55 | - | - | - | 915.1  | 439.119 | 1.20267 |
| 56 | - | - | - | 919.6  | 447.362 | 1.30982 |
| 57 | - | - | - | 922.6  | 452.85  | 1.28323 |
| 58 | - | - | - | 922    | 451.788 | 1.85924 |
| 59 | - | - | - | 929.9  | 466.385 | 1.12691 |
| 60 | - | - | - | 930.4  | 467.181 | 1.23676 |
| 61 | - | - | - | 930.1  | 466.65  | 1.7339  |
| 62 | - | - | - | 941    | 486.82  | 1.16493 |
| 63 | - | - | - | 944.2  | 492.682 | 1.21305 |
| 64 | - | - | - | 943.8  | 491.878 | 1.2993  |
| 65 | - | - | - | 947.7  | 499.112 | 1.78388 |
| 66 | - | - | - | 957.8  | 517.599 | 1.31812 |
| 67 | - | - | - | 973.9  | 547.339 | 1.22246 |
| 68 | - | - | - | 975.2  | 549.75  | 1.29303 |
| 69 | - | - | - | 985.3  | 568.237 | 1.16287 |
| 70 | - | - | - | 1004.1 | 602.934 | 1.62905 |
| 71 | - | - | - | 1002.3 | 599.641 | 1.74033 |
| 72 | - | - | - | 1011.3 | 616.196 | 1.14231 |
| 73 | - | - | - | 1013.5 | 620.289 | 1.21885 |
| 74 | - | - | - | 1019.5 | 631.309 | 1.19074 |
| 75 | - | - | - | 1014.9 | 622.808 | 1.35475 |
| 76 | - | - | - | 1006.5 | 607.38  | 1.29383 |
| 77 | - | - | - | 1010.1 | 613.992 | 1.40318 |
| 78 | - | - | - | 1015   | 623.123 | 1.89523 |
| 79 | - | - | - | 1026.5 | 644.218 | 1.14231 |

|                                  |          |         |       |        |          |         |
|----------------------------------|----------|---------|-------|--------|----------|---------|
| 80                               | -        | -       | -     | 1027.7 | 646.422  | 1.36881 |
| 81                               | -        | -       | -     | 1027.8 | 646.737  | 1.92491 |
| 82                               | -        | -       | -     | 1032.6 | 655.553  | 1.2251  |
| 83                               | -        | -       | -     | 1038.4 | 666.258  | 1.26728 |
| 84                               | -        | -       | -     | 1045.9 | 680.111  | 1.60781 |
| 85                               | -        | -       | -     | 1053.3 | 693.753  | 1.90303 |
| 86                               | -        | -       | -     | 1068.2 | 721.373  | 1.28066 |
| 87                               | -        | -       | -     | 1107.4 | 793.817  | 1.31334 |
| 88                               | -        | -       | -     | 1106.7 | 792.459  | 1.94037 |
| 89                               | -        | -       | -     | 1101.6 | 782.951  | 1.78789 |
| 90                               | -        | -       | -     | 1100.6 | 781.14   | 1.83924 |
| 91                               | -        | -       | -     | 1120.2 | 817.362  | 1.78945 |
| 92                               | -        | -       | -     | 1119   | 815.098  | 1.83924 |
| 93                               | -        | -       | -     | 1120.7 | 818.268  | 1.16397 |
| 94                               | -        | -       | -     | 1136.8 | 848.151  | 1.33356 |
| 95                               | -        | -       | -     | 1136.8 | 848.151  | 1.8548  |
| 96                               | -        | -       | -     | 1163.2 | 896.806  | 1.36109 |
| 97                               | -        | -       | -     | 1302.5 | 1154.199 | 1.19927 |
| 98                               | -        | -       | -     | 1303.2 | 1155.48  | 1.8791  |
| 99                               | -        | -       | -     | 1342.3 | 1227.819 | 1.22152 |
| 100                              | -        | -       | -     | 1341.7 | 1226.539 | 2.19069 |
| 101                              | -        | -       | -     | 1364.9 | 1269.43  | 1.41374 |
| 102                              | -        | -       | -     | 1221.3 | 1004.181 | 1.4941  |
| 103                              | -        | -       | -     | 1263.1 | 1081.458 | 1.36605 |
| (E)-2-Hexenal dimer              | C6728263 | C6H10O  | 98.1  | 845    | 341.958  | 1.52227 |
| (E)-2-Hexenal monomer            | C6728263 | C6H10O  | 98.1  | 845.9  | 343.046  | 1.187   |
| 1,8-Cineole dimer                | C470826  | C10H18O | 154.3 | 1039.4 | 668.172  | 1.72879 |
| 1,8-Cineole monomer              | C470826  | C10H18O | 154.3 | 1039.9 | 669.06   | 1.29601 |
| 1-Menthol dimer                  | C2216515 | C10H20O | 156.3 | 1164.6 | 899.447  | 1.8906  |
| 1-Menthol monomer                | C2216515 | C10H20O | 156.3 | 1167.1 | 904.068  | 1.21812 |
| 1-Octen-3-one                    | C4312996 | C8H14O  | 126.2 | 980.7  | 559.797  | 1.2695  |
| 1-Propanol                       | C71238   | C3H8O   | 60.1  | 567.8  | 133.475  | 1.11258 |
| 2-Butanone dimer                 | C78933   | C4H8O   | 72.1  | 598.6  | 148.067  | 1.24992 |
| 2-Butanone monomer               | C78933   | C4H8O   | 72.1  | 600.2  | 148.809  | 1.06203 |
| 2-Methyl butanol dimer           | C137326  | C5H12O  | 88.1  | 730.6  | 226.066  | 1.47232 |
| 2-Methyl butanol monomer         | C137326  | C5H12O  | 88.1  | 732.1  | 227.383  | 1.22414 |
| 2-Methylbutanal dimer            | C96173   | C5H10O  | 86.1  | 661.8  | 177.992  | 1.4041  |
| 2-Methylbutanal monomer          | C96173   | C5H10O  | 86.1  | 659.7  | 177.003  | 1.16061 |
| 2-Pentenal (E) dimer             | C1576870 | C5H8O   | 84.1  | 745.3  | 238.45   | 1.36565 |
| 2-Pentenal (E) monomer           | C1576870 | C5H8O   | 84.1  | 745.6  | 238.713  | 1.10984 |
| 2-Pentylfuran                    | C3777693 | C9H14O  | 138.2 | 1001.9 | 598.781  | 1.24128 |
| 3-Methylbutanal dimer            | C590863  | C5H10O  | 86.1  | 652.4  | 173.54   | 1.41084 |
| 3-Methylbutanal monomer          | C590863  | C5H10O  | 86.1  | 649.7  | 172.304  | 1.17493 |
| 3-Octanol dimer                  | C589980  | C8H18O  | 130.2 | 983.5  | 565.022  | 1.77447 |
| 3-Octanol monomer                | C589980  | C8H18O  | 130.2 | 984.2  | 566.228  | 1.38555 |
| 5-Methyl-2-furanmethanol dimer   | C3857258 | C6H8O2  | 112.1 | 954.5  | 511.571  | 1.5706  |
| 5-Methyl-2-furanmethanol monomer | C3857258 | C6H8O2  | 112.1 | 955.8  | 513.982  | 1.2601  |
| 6-Methyl-5-hepten-2-one          | C110930  | C8H14O  | 126.2 | 994.7  | 585.518  | 1.18325 |
| Acetone                          | C67641   | C3H6O   | 58.1  | 541.7  | 121.109  | 1.12438 |
| Benzaldehyde                     | C100527  | C7H6O   | 106.1 | 955    | 512.563  | 1.15226 |
| Butyl acetate                    | C123864  | C6H12O2 | 116.2 | 804.6  | 294.952  | 1.24116 |
| Ethyl 2-methylbutanoate          | C7452791 | C7H14O2 | 130.2 | 841.7  | 338.13   | 1.66084 |
| Ethyl 2-methylpropanoate         | C97621   | C6H12O2 | 116.2 | 749.8  | 242.27   | 1.56892 |
| Ethyl butyrate                   | C105544  | C6H12O2 | 116.2 | 800.4  | 290.033  | 1.20896 |
| Heptanal dimer                   | C111717  | C7H14O  | 114.2 | 899.4  | 410.268  | 1.70124 |
| Heptanal monomer                 | C111717  | C7H14O  | 114.2 | 899.3  | 409.926  | 1.32837 |
| Heptanoic acid dimer             | C111148  | C7H14O2 | 130.2 | 1053   | 693.3    | 1.763   |
| Heptanoic acid monomer           | C111148  | C7H14O2 | 130.2 | 1051.6 | 690.583  | 1.36001 |
| Hexanal dimer                    | C66251   | C6H12O  | 100.2 | 791.1  | 279.29   | 1.56594 |
| Hexanal monomer                  | C66251   | C6H12O  | 100.2 | 791.1  | 279.29   | 1.2557  |

|                                  |           |          |       |        |         |         |
|----------------------------------|-----------|----------|-------|--------|---------|---------|
| Isoamyl acetate dimer            | C123922   | C7H14O2  | 130.2 | 876    | 378.144 | 1.74648 |
| Isoamyl acetate monomer          | C123922   | C7H14O2  | 130.2 | 876.6  | 378.846 | 1.3001  |
| Linalool oxide dimer             | C60047178 | C10H18O2 | 170.3 | 1076.6 | 736.767 | 1.81745 |
| Linalool oxide monomer           | C60047178 | C10H18O2 | 170.3 | 1077   | 737.673 | 1.26043 |
| Methyl 2-methylbutanoate dimer   | C868575   | C6H12O2  | 116.2 | 768.8  | 258.259 | 1.54017 |
| Methyl 2-methylbutanoate monomer | C868575   | C6H12O2  | 116.2 | 770    | 259.284 | 1.18366 |
| Pentanal dimer                   | C110623   | C5H10O   | 86.1  | 694.6  | 195.765 | 1.42769 |
| Pentanal monomer                 | C110623   | C5H10O   | 86.1  | 694.9  | 196.046 | 1.17999 |
| Propylacetate dimer              | C109604   | C5H10O2  | 102.1 | 707.7  | 206.831 | 1.48212 |
| Propylacetate monomer            | C109604   | C5H10O2  | 102.1 | 708.4  | 207.358 | 1.16971 |
| Propylsulfide                    | C111477   | C6H14S   | 118.2 | 884.7  | 388.206 | 1.16255 |

- represents volatile compounds that not annotated in the database.
